# Supplementary material
Source: publisher site journal article supplement (https://www.dovepress.com/article/601777)
Supplement: Supplementary file 1 [file 601777%20Revised%20%252509supplementary%20material.docx]

**Supplementary material**

**Supplementary Figure 1: Change in clinical indicators during follow-up in IMN patients with anti-PLA2R-antibody negative.** (A) proteinuria and serum albumin in total population; (B) eGFR in total population; (C) proteinuria and serum albumin in SAb-/GAg+; (D) eGFR in SAb-/GAg+. Data are presented as mean ± standard deviation by assigned treatment. eGFR: estimated glomerular filtration rate; RTX: rituximab.

**
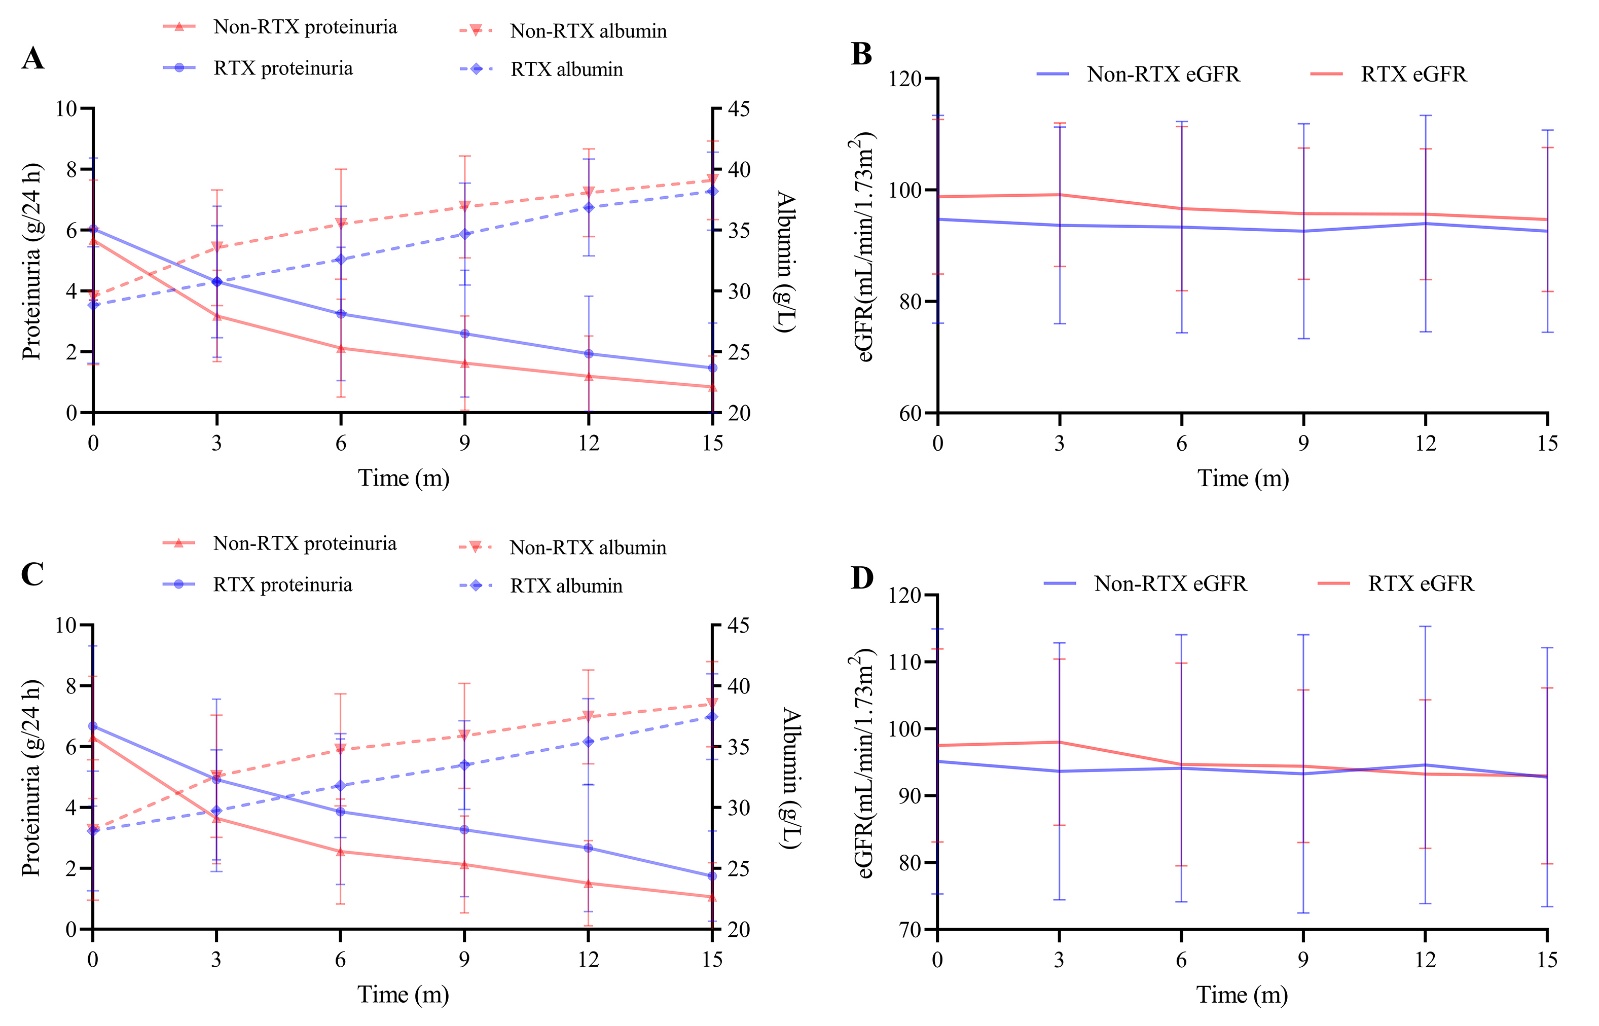
**

**Supplementary Figure 2: Subgroup analyses of the association between treatment regimen and 15 months complete remission.** (A) all population; (B) SAb-/GAg+ subgroup. Adjusted for age, sex, SBP, DBP, pathological, proteinuria, eGFR, and albumin.

**
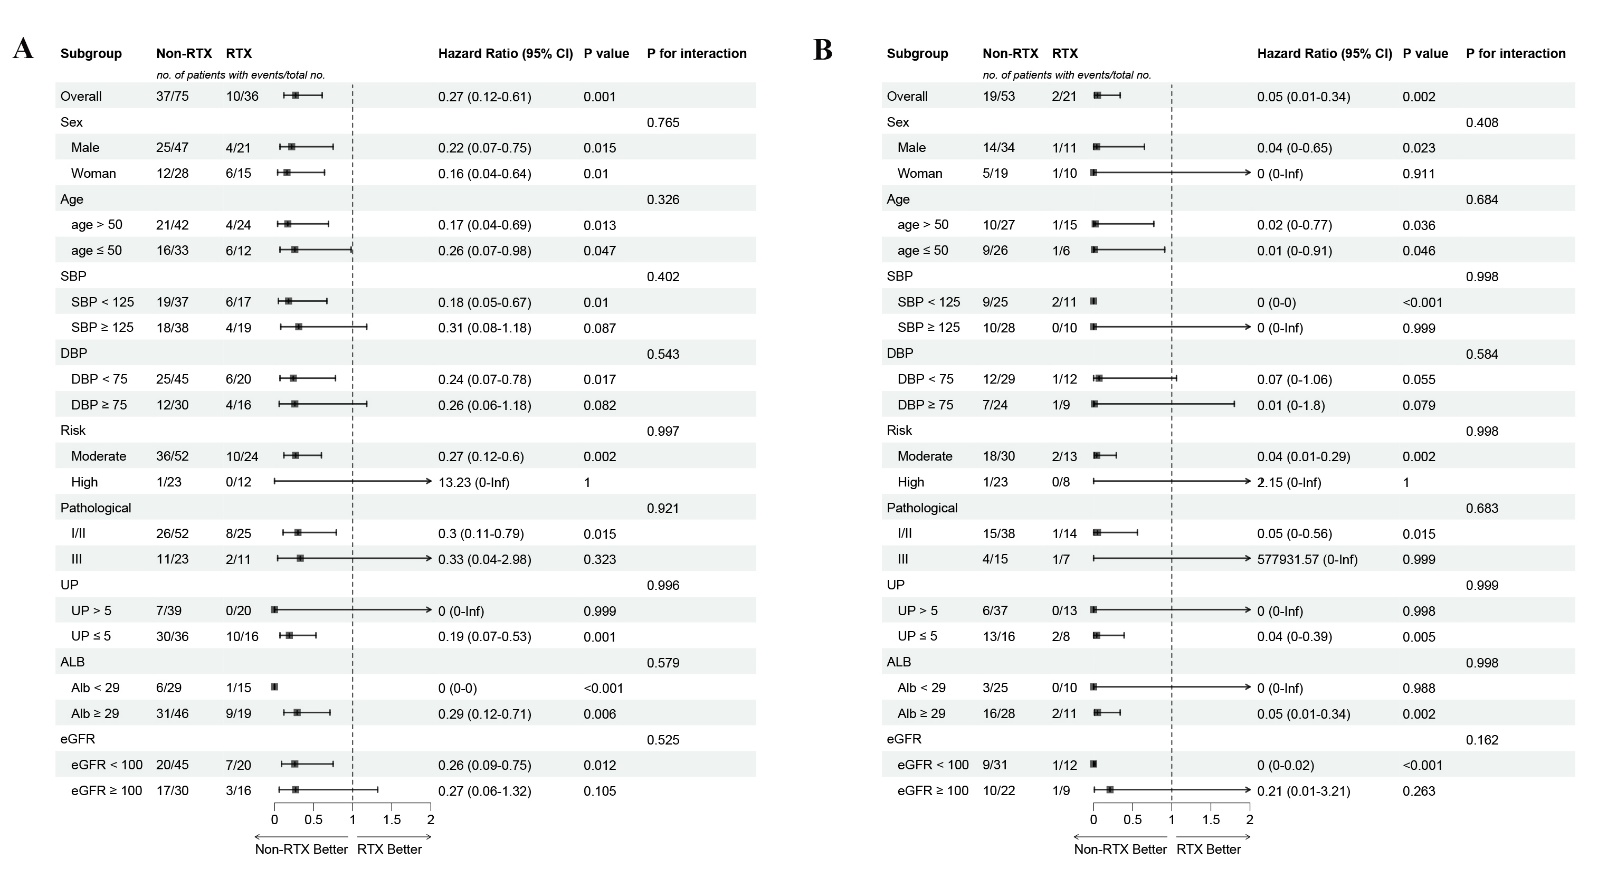
**
